# Supplementary material for: Creative tempo: Spatiotemporal dynamics of the default mode network in improvisational musicians
Source: PubMed Central journal article supplement — bioRxiv. 2024 Apr 9:2024.04.07.588391. Preprint. [Version 1] doi: 10.1101/2024.04.07.588391 (PMC11030431; doi:10.1101/2024.04.07.588391), 2024-04-09
Supplement: media-1.pdf [file media-1.pdf]

**Supplementary figures:**

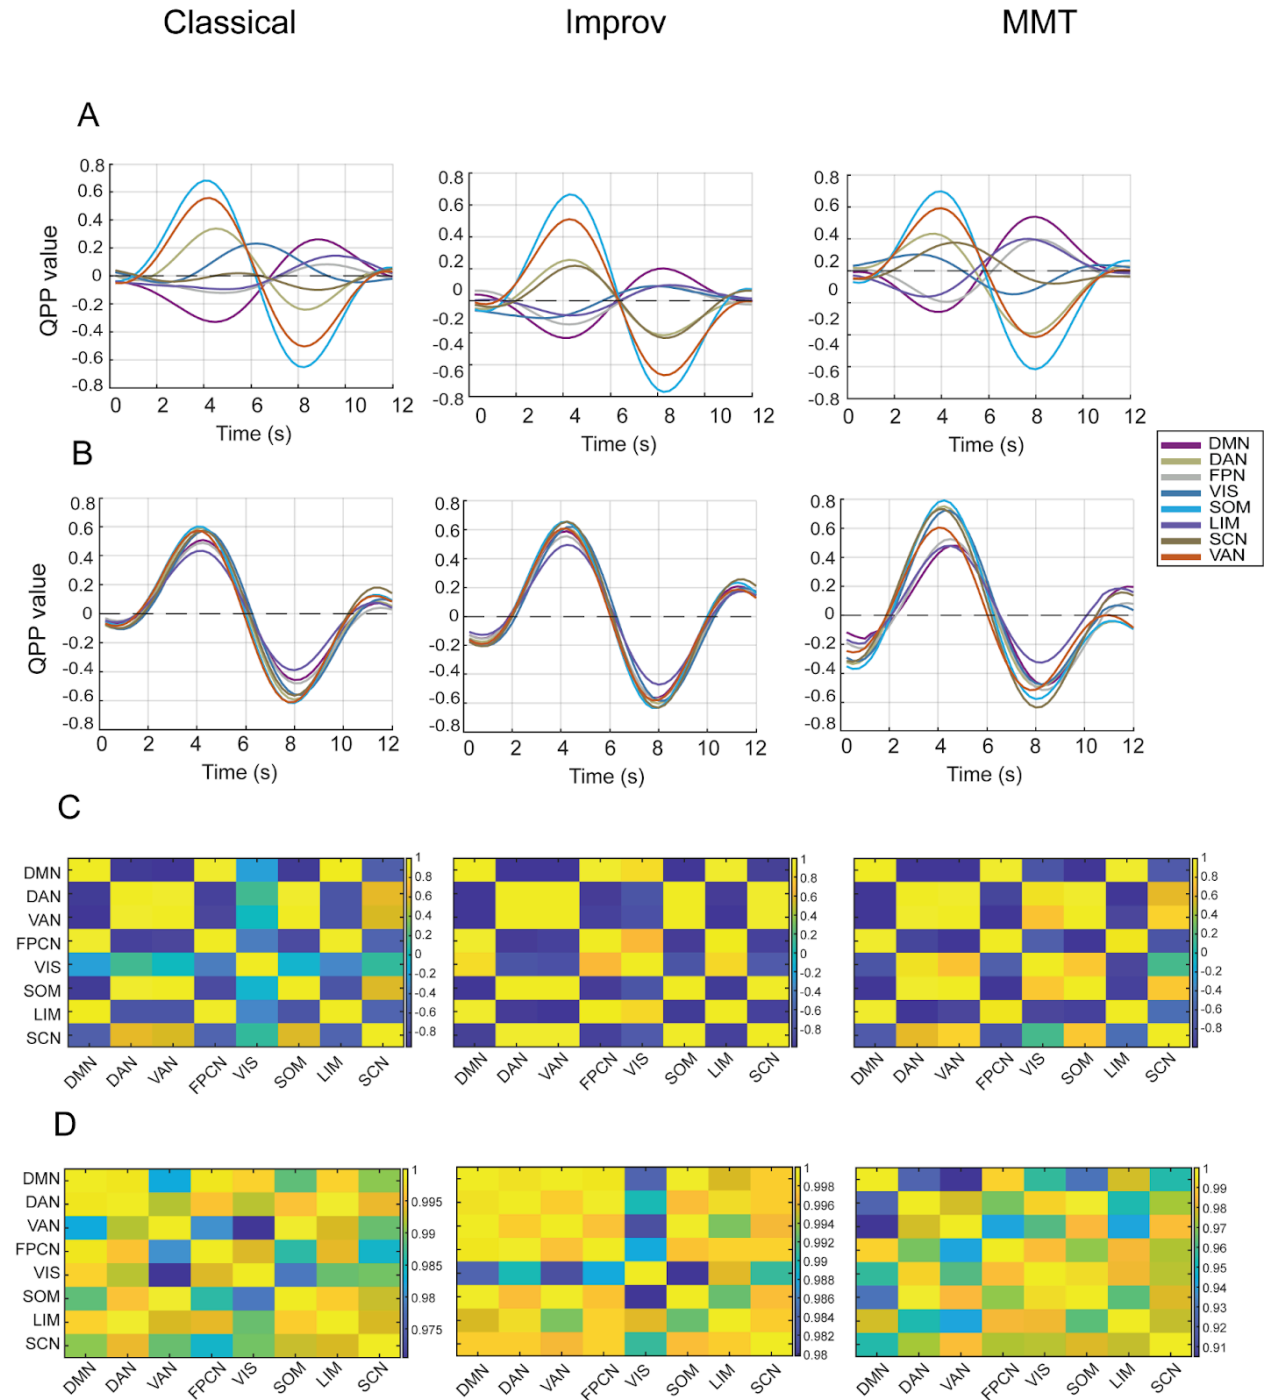

**Supp. Figure 1:** Global signal regressed (GSR) vs non-GSR data. QPP waveforms with GSR (A) and without GSR (B) for the 3 musical training groups. FC matrices showing correlations between 8x8 Yeo's networks during the QPP for GSR (C), and non-GSR (D) scans.

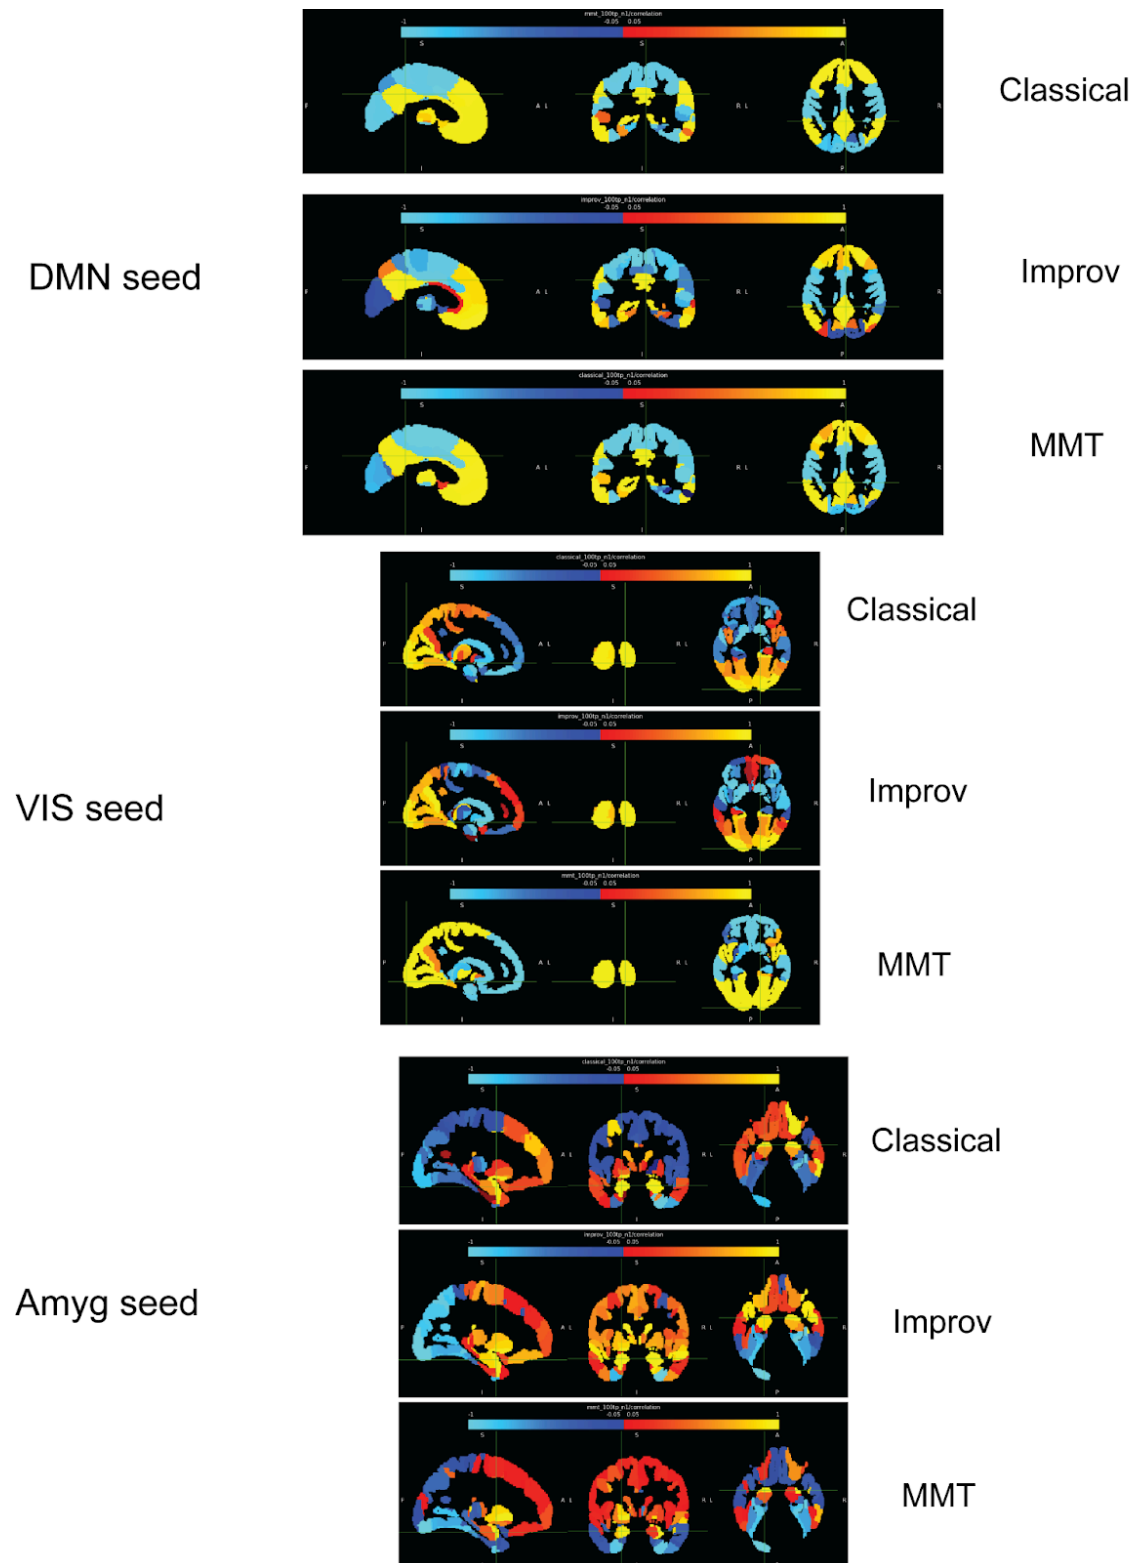

**Supp. Figure 2:** Seed voxel locations within major ROIs analyzed for A) DMN, B) VIS, and C) Amygdala. Color bar indicates correlation to seed region of normalized BOLD signal during 1 cycle of cPCA based QPP between -1 and +1. Note the very high correlation (bright yellow) of all voxels within each ROI to the seed voxels. See table 1 for seed voxel coordinates.
